# Supplementary material for: Cobalt-catalyzed C–SMe bond activation of heteroaromatic thioethers
Source: Royal Society of Chemistry journal article supplement (doi:10.1039/c0cc01055c), 2010-01-01
Supplement: c0cc01055c.pdf [file c0cc01055c.pdf]

## Cobalt-catalyzed C-SMe bond activation of heteroaromatic thioethers

Jeanne-Marie Begouin,<sup>ab</sup> Michael Rivard<sup>b</sup> and Corinne Gosmini<sup>\*a</sup>

### General Procedure 1: for the synthesis of 2-methylthio-4-arylpyrimidines 1a-e

**Procedure 1 : from arylbromides:** *Zinc insertion and cross-coupling.* To a solution of CoBr<sub>2</sub> (10 mol%, 0.75 mmol, 165 mg) and Zinc powder (19 mmol, 1.2 g) in acetonitrile (6 mL) were successively added at room temperature allylchloride (2.25 mmol, 190  $\mu$ L) and trifluoroacetic acid (100  $\mu$ L), causing an immediate rise in temperature and color change to dark grey. After stirring the resulting mixture for 3 minutes, aryl bromide (7.5 mmol) and 2-methylthio-4-chloropyrimidine (10 mmol, 1.16 mL) were added. The medium was then stirred at 50 °C until aryl bromide was consumed. *Work-up and purification.* The reaction mixture was poured into a saturated aqueous solution of NH<sub>4</sub>Cl and extracted with dichloromethane. The organic layer was washed with a saturated aqueous solution of NaCl and dried over MgSO<sub>4</sub>. Evaporation of solvent and purification by column chromatography on silica gel (pentane/diethyl ether or petroleum ether/diethyl ether) afforded the coupling product characterized by NMR (<sup>1</sup>H, <sup>13</sup>C) and mass spectrometry.

➤ 2-Methylsulfanyl-4-(4-trifluoromethyl-phenyl)-pyrimidine **1a**

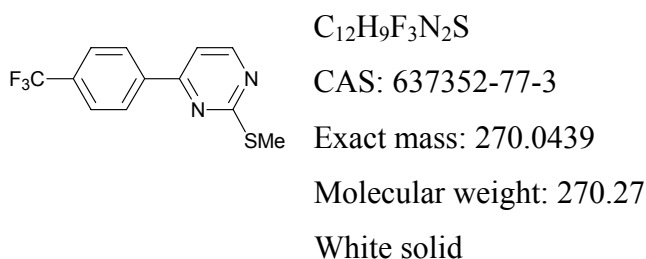

According to general procedure 1: from 4-bromobenzotrifluoride : **Zinc insertion and cross-coupling:** CoBr<sub>2</sub> (10 mol%, 0.75 mmol, 165 mg), Zinc powder (19 mmol, 1.2 g) in acetonitrile (6 mL), allylchloride (2.25 mmol, 190  $\mu$ L), trifluoroacetic acid (100  $\mu$ L), R.T., 3 min; 4-bromobenzotrifluoride (7.5 mmol, 1.05 mL), 2-methylthio-4-chloropyrimidine (10 mmol, 1.16 mL), T= 50 °C, 4 h; **work-up and purification:** extracted with

dichloromethane (3 x 70 mL), purified by alumina (pentane : ether = 90:10) to give **1a** as a white solid (1.4 g, 70 %).

**<sup>1</sup>H-NMR** (300MHz, CDCl<sub>3</sub>) δ/ppm: 2.68 (s, 3H) ; 7.42 (d, 5.2Hz, 1H) ; 7.78 (d, 8.2Hz, 2H) ; 8.23 (d, 8.2Hz, 2H) ; 8.63 (d, 5.2Hz, 1H).

**<sup>13</sup>C-NMR** (75MHz, CDCl<sub>3</sub>) δ/ppm: 14.3 (CH<sub>3</sub>), 112.1 (CH), 123.9 (q, <sup>1</sup>J<sub>C-F</sub> = 271 Hz, C), 125.9 (q, <sup>3</sup>J<sub>C-F</sub> = 3.8 Hz, 2CH), 127.5 (2 CH), 132.7 (q, <sup>2</sup>J<sub>C-F</sub> = 32.4 Hz, C), 139.7 (q, <sup>5</sup>J<sub>C-F</sub> = 1.4 Hz, C), 158.1 (CH), 162.3 (C), 173.3 (C).

**HRMS (C<sub>12</sub>H<sub>9</sub>F<sub>3</sub>N<sub>2</sub>S)**: calc: 270.0439, found: 270.0435

➤ 4-(2-Methylsulfanyl-pyrimidin-4-yl)-benzoic acid ethyl ester **1b**

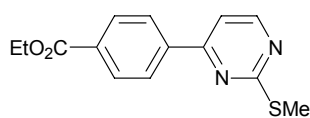

C<sub>14</sub>H<sub>14</sub>N<sub>2</sub>O<sub>2</sub>S

CAS: 259541-93-0

Exact mass: 274.0776

Molecular weight: 274.34

White Solid

According to general procedure 1: from ethyl 4-bromobenzoate: **Zinc insertion and cross-coupling**: CoBr<sub>2</sub> (10 mol%, 0.75 mmol, 165 mg), Zinc powder (19 mmol, 1.2 g) in acetonitrile (6 mL), allylchloride (2.25 mmol, 190 μL), trifluoroacetic acid (100 μL), R.T., 3 min; ethyl 4-bromobenzoate (7.5 mmol, 1.22 mL), 2-methylthio-4-chloropyrimidine (10 mmol, 1.16 mL), T= 50 °C, 3 h 30; **work-up and purification**: extracted with dichloromethane (3 x 70 mL), purified by silica gel (petroleum ether : ether = 70 : 30) to give **1b** as a white solid (1.54 g, 75%).

**<sup>1</sup>H-NMR** (300MHz, CDCl<sub>3</sub>) δ/ppm: 1.45 (t, 7.10Hz, 3H), 2.69 (s, 3H), 4.44 (q, 7.10Hz, 2H), 7.45 (d, 5.2 Hz, 1H), 8.19 (m, 4H), 8.63 (d, 5.1 Hz, 1H).

**<sup>13</sup>C-NMR** (75MHz, CDCl<sub>3</sub>) δ/ppm: 12.3 (CH<sub>3</sub>), 14.3 (CH<sub>3</sub>), 59.3 (CH<sub>2</sub>), 110.2 (CH), 125.2 (2CH), 128.1 (2CH), 130.8 (C), 138.1 (C), 155.4 (CH), 161.2 (C), 164.0 (C), 170.9 (C).

**HRMS (C<sub>14</sub>H<sub>14</sub>N<sub>2</sub>O<sub>2</sub>S)**: calc: 274.0776, found: 274.0780

➤ 4-(2-Methylsulfanyl-pyrimidin-4-yl)-benzonitrile **1c**

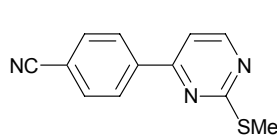

$C_{12}H_9N_3S$

CAS: 874778-91-3

Exact mass: 227.0517

Molecular weight: 227.29

White Solid

According to general procedure 1: from 4-bromobenzonitrile: **Zinc insertion and cross-coupling**:  $CoBr_2$  (10 mol%, 0.75 mmol, 165 mg), Zinc powder (19 mmol, 1.2 g) in acetonitrile (6 mL), allylchloride (2.25 mmol, 190  $\mu$ L), trifluoroacetic acid (100  $\mu$ L), R.T., 3 min; 4-bromobenzonitrile (7.5 mmol, 1.4 g), 2-methylthio-4-chloropyrimidine (7.5 mmol, 0.87 mL), T= 50 °C, 2 h; **work-up and purification**: extracted with dichloromethane (3 x 70 mL), purified by silica gel (petroleum ether : ether = 30:70) to give **1c** as a white solid (1.2 g, 70 %).

$^1H$ -NMR (300MHz,  $CDCl_3$ )  $\delta$ /ppm: 2.68 (s, 3H), 7.43 (d, 3.5Hz, 1H), 7.82 (d, 7.8Hz, 2H), 8.23 (d, 7.9Hz 2H), 8.67 (d, 2.8Hz, 1H).

$^{13}C$ -NMR (75MHz,  $CDCl_3$ )  $\delta$ /ppm: 14.3 ( $CH_3$ ), 112.2 (CH), 114.6 (C), 118.3 (C), 127.8 (2CH), 132.7 (2CH), 140.5 (C), 158.1 (CH), 161.9 (C), 173.5 (C).

HRMS ( $C_{12}H_9N_3S$ ): calc: 227.0517, found: 227.0520

➤ 1-[4-(2-Methylsulfanyl-pyrimidin-4-yl)-phenyl]-ethanone **1d**

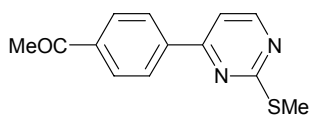

$C_{13}H_{12}N_2OS$

Exact mass: 244.0670

Molecular weight: 244.31

White solid, mp: 142°C

According to general procedure 1: from 4-bromoacetophenone: **Zinc insertion and cross-coupling**:  $CoBr_2$  (10 mol%, 0.75 mmol, 165 mg), Zinc powder (19 mmol, 1.2 g) in acetonitrile (6 mL), allylchloride (2.25 mmol, 190  $\mu$ L), trifluoroacetic acid (100  $\mu$ L), R.T., 3 min; 4-bromoacetophenone (7.5 mmol, 1.5 g), 2-methylthio-4-chloropyrimidine (7.5 mmol,

0.87 mL), T= 50 °C, 2 h; **work-up and purification:** extracted with dichloromethane (3 x 70 mL), purified by silica gel (petroleum ether : ether = 40:60) to give **1d** as a white solid (732 mg, 40 %).

**<sup>1</sup>H-NMR** (300MHz, CDCl<sub>3</sub>) δ/ppm: 2.68 (s, 6H), 7.44 (d, 5.2Hz, 1H), 8.10 (d, 8.2Hz, 2H), 8.21 (d, 8.2Hz, 2H), 8.63 (d, 5.2Hz, 1H).

**<sup>13</sup>C-NMR** (75MHz, CDCl<sub>3</sub>) δ/ppm: 14.3 (CH<sub>3</sub>), 26.8 (CH<sub>3</sub>), 112.3 (CH), 127.4 (2CH), 128.8 (2CH), 138.8 (C), 140.5 (C), 158.0 (CH), 162.6 (C), 173.2 (C), 197.6 (C).

**HRMS (C<sub>13</sub>H<sub>12</sub>N<sub>2</sub>OS):** calc: 244.0670, found: 244.0669

**IR(neat,cm<sup>-1</sup>):** 2974, 1674 (C=O), 1555, 1418, 1396,1348, 1268, 1085

➤ 4-(4-Methoxy-phenyl)-2-methylsulfanyl-pyrimidine **1e**

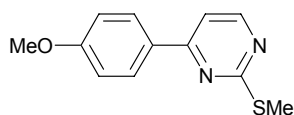

C<sub>12</sub>H<sub>12</sub>N<sub>2</sub>OS

CAS: 148990-17-4

Exact mass: 232.0670

Molecular weight: 232.30

White solid

According to general procedure 1: from 4-bromoanisole: **Zinc insertion and cross-coupling:** CoBr<sub>2</sub> (10 mol%, 0.75 mmol, 165 mg), Zinc powder (19 mmol, 1.2 g) in acetonitrile (6 mL), allylchloride (2.25 mmol, 190 μL), trifluoroacetic acid (100 μL), R.T., 3 min; 4-bromoanisole (7.5 mmol, 0.94 mL), 2-methylthio-4-chloropyrimidine (7.5 mmol, 0.87 mL), T= 50 °C, 8 h; **work-up and purification:** extracted with dichloromethane (3 x 70 mL), purified by silica gel (petroleum ether : ether = 40:60) to give **1e** as a white solid (470 mg, 27 %).

**<sup>1</sup>H-NMR** (300MHz, CDCl<sub>3</sub>) δ/ppm: 2.57 (s, 3H), 3.81 (s, 3H), 6.93 (d, 8.7Hz, 2H), 7.22 (d, 5.3Hz, 1H), 8.01 (d, 8.7Hz, 2H), 8.41 (d, 5.3Hz, 1H).

**<sup>13</sup>C-NMR** (75MHz, CDCl<sub>3</sub>) δ/ppm: 15.3 (CH<sub>3</sub>), 56.6 (CH<sub>3</sub>), 112.1 (CH), 115.4 (2CH), 117.5 (C), 129.9 (2CH),158.5 (CH), 163.3 (C), 164.5 (C), 173.6 (C).

**HRMS (C<sub>12</sub>H<sub>12</sub>N<sub>2</sub>OS):** calc: 232.0670, found: 232.0671

## General Procedures 2.1 and 2.2 for the synthesis of 2,4-diaryl-pyrimidines 2a-c and 3a-e

**Procedure 2.1.** from arylbromides and 2-methylthio-4-chloropyrimidine: *Zinc insertion and cross-coupling.* To a solution of  $\text{CoBr}_2$  (30 mol%, 2.25 mmol, 495 mg) and Zinc powder (19 mmol, 1.2 g) in acetonitrile (6 mL) were successively added at room temperature allylchloride (6.8 mmol, 560  $\mu\text{L}$ ) and trifluoroacetic acid (100  $\mu\text{L}$ ), causing an immediate rise in temperature and color change to dark grey. After stirring the resulting mixture for 3 minutes, aryl bromide (7.5 mmol) and 2-methylthio-4-chloropyrimidine (3.7 mmol, 0.44 mL) were added. The medium was then stirred at 50 °C until aryl bromide was consumed. The amount of the corresponding coupling product was measured by GC (addition of iodine) using an internal reference (dodecane, 200  $\mu\text{L}$ ). *Work-up and purification.* The reaction mixture was poured into a saturated aqueous solution of  $\text{NH}_4\text{Cl}$  and extracted with dichloromethane. The organic layer was washed with a saturated aqueous solution of NaCl and dried over  $\text{MgSO}_4$ . Evaporation of solvent and purification by column chromatography on silica gel (pentane/diethyl ether or petroleum ether/diethyl ether) afforded the coupling product characterized by NMR ( $^1\text{H}$ ,  $^{13}\text{C}$ ) and mass spectrometry.

**Procedure 2.2.** from arylbromides and 2-methylthio-4-arylpyrimidines **1**: *Zinc insertion and cross-coupling.* To a solution of  $\text{CoBr}_2$  (30 mol%, 1 mmol, 220 mg) and Zinc powder (7.5 mmol, 0.47 g) in acetonitrile (6 mL) were successively added at room temperature allylchloride (3 mmol, 250  $\mu\text{L}$ ) and trifluoroacetic acid (100  $\mu\text{L}$ ), causing an immediate rise in temperature and color change to dark grey. After stirring the resulting mixture for 3 minutes, aryl bromide (3 mmol) and 2-methylthio-4-arylpyrimidine (3 mmol) were added. The medium was then stirred at 50 °C until aryl bromide was consumed. *Work-up and purification.* The reaction mixture was poured into a saturated aqueous solution of  $\text{NH}_4\text{Cl}$  and extracted with dichloromethane. The organic layer was washed with a saturated aqueous solution of NaCl and dried over  $\text{MgSO}_4$ . Evaporation of solvent and purification by column chromatography on silica gel (pentane/diethyl ether or petroleum ether/diethyl ether) afforded the coupling product characterized by NMR ( $^1\text{H}$ ,  $^{13}\text{C}$ ) and mass spectrometry.

➤ 2,4-Bis-(4-trifluoromethyl-phenyl)-pyrimidine **2a**

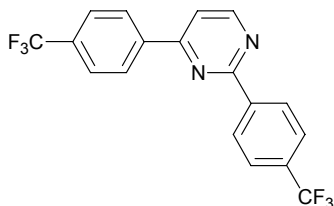

$C_{18}H_{10}F_6N_2$

Exact mass: 368.0748

Molecular weight: 368.28

White solid, mp: 138°C

According to general procedure 2.1: from 4-bromobenzotrifluoride and 2-methylthio-4-chloropyrimidine: **Zinc insertion and cross-coupling**.  $CoBr_2$  (30 mol%, 2.25 mmol, 495 mg), Zinc powder (19 mmol, 1.2 g) in acetonitrile (6 mL), allylchloride (6.8 mmol, 560  $\mu$ L), trifluoroacetic acid (100  $\mu$ L), R.T., 3 min, 4-bromobenzotrifluoride (7.5 mmol, 1 mL) and 2-methylthio-4-chloropyrimidine (3.7 mmol, 0.44 mL), 50 °C, 5 h 30. **work-up and purification**: extracted with dichloromethane (3 x 70 mL), purified by silica gel (petroleum ether : ether = 80 : 20) to give **2a** as a white solid (831 mg, 61%).

**$^1H$ -NMR** (300MHz,  $CDCl_3$ )  $\delta$  /ppm: 7.71 (m, 5H), 8.83 (m, 2H), 8.70 (m, 2H), 8.96 (m, 1H).

**$^{13}C$ -NMR** (75MHz,  $CDCl_3$ )  $\delta$  /ppm: 115.5 (CH), 124.0 (q,  $^1J_{C-F} = 254.1$  Hz, C), 124.4 (q,  $^1J_{C-F} = 254.4$  Hz, C), 125.6 (q,  $^3J_{C-F} = 3.8$  Hz, 2CH), 126.0 (q,  $^3J_{C-F} = 3.8$  Hz, 2CH), 127.5 (2CH), 128.6 (2CH), 132.6 (q,  $^2J_{C-F} = 31.9$  Hz, C), 133.0 (q,  $^2J_{C-F} = 31.9$  Hz, C), 140.0 (C), 140.6 (C), 158.4 (CH), 162.6 (C), 163.4 (C).

**HRMS** ( $C_{18}H_{10}F_6N_2$ ): calc: 368.0748, found: 368.0747

**IR**(neat, $cm^{-1}$ ): 2974, 1323, 1272, 1066, 1046

➤ 2,4-Bis-(4-carboethoxyphenyl)-pyrimidine **2b**

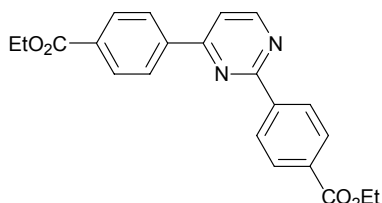

$C_{22}H_{20}N_2O_4$

Exact mass: 376.1423

Molecular weight: 376.41

White solid, mp: 100°C

According to general procedure 2.1: from ethyl 4-bromobenzoate and 2-methylthio-4-chloropyrimidine: **Zinc insertion and cross-coupling**.  $CoBr_2$  (30 mol%, 2.25 mmol, 495 mg), Zinc powder (19 mmol, 1.2 g) in acetonitrile (6 mL), allylchloride (6.8 mmol, 560  $\mu$ L), trifluoroacetic acid (100  $\mu$ L), R.T., 3 min, ethyl 4-bromobenzoate (7.5 mmol, 1.22 mL) and 2-methylthio-4-chloropyrimidine (3.7 mmol, 0.44 mL), 50 °C, 4 h. **work-up and purification**:

extracted with dichloromethane (3 x 70 mL), purified by silica gel (petroleum ether : ether = 30 : 70) to give **2b** as a white solid (835 mg, 60%).

**<sup>1</sup>H-NMR** (300MHz, CDCl<sub>3</sub>) δ /ppm: 1.46 (t, 7.1Hz, 6H), 4.46 (q, 7.1Hz, 2H), 4.45 (q, 7.1Hz, 2H), 7.71 (d, 5.3Hz, 1H), 8.20-8.33 (m, 6H), 8.67 (d, 8.3Hz, 2H), 8.94 (d, 5.2Hz, 1H)

**<sup>13</sup>C-NMR** (75MHz, CDCl<sub>3</sub>) δ /ppm: 14.4 (CH<sub>3</sub>), 14.4 (CH<sub>3</sub>), 61.2 (CH<sub>2</sub>), 61.4 (CH<sub>2</sub>), 115.5 (CH), 127.2 (2CH), 128.2 (2CH), 129.8 (2CH), 130.2 (2CH), 132.3 (C), 132.6 (C), 140.6 (C), 141.5 (C), 158.3 (CH), 163.0 (C), 163.8 (C), 166.1 (C), 166.4 (C).

**HRMS (C<sub>22</sub>H<sub>20</sub>N<sub>2</sub>O<sub>4</sub>):** calc: 376.1423, found: 376.1419

**IR(neat,cm<sup>-1</sup>):** 1722 (C=O), 1566, 1348, 1270, 1120, 1106, 1095

➤ 2,4-Bis-(4-cyanophenyl)-pyrimidine **2c**

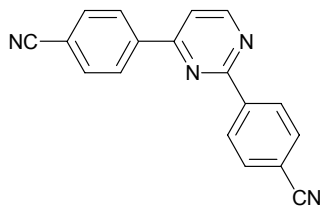

C<sub>18</sub>H<sub>10</sub>N<sub>4</sub>

CAS: 160522-99-6

Exact mass: 282.0905

Molecular weight: 282.30

White solid,

According to general procedure 2.1.: from 4-bromobenzonitrile and 2-methylthio-4-chloropyrimidine: **Zinc insertion and cross-coupling.** CoBr<sub>2</sub> (30 mol%, 2.25 mmol, 495 mg), Zinc powder (19 mmol, 1.2 g) in acetonitrile (6 mL), allylchloride (6.8 mmol, 560 μL), trifluoroacetic acid (100 μL), R.T., 3 min, 4-bromobenzonitrile (7.5 mmol, 1.4 g) and 2-methylthio-4-chloropyrimidine (3.7 mmol, 0.44 mL), 50 °C, 4 h. **work-up and purification:** extracted with dichloromethane (3 x 70 mL), purified by silica gel (petroleum ether : ether = 80 : 20 to 0 : 100) to give **2c** as a white solid (627 mg, 60%).

**<sup>1</sup>H-NMR** (300MHz, CDCl<sub>3</sub>) δ /ppm: 7.74 (m, 1H), 7.83 – 7.90 (m, 4H), 8.34 (m, 2H), 8.71 (m, 2H), 8.99 (m, 1H).

**<sup>13</sup>C-NMR** (75MHz, CDCl<sub>3</sub>) δ /ppm: 114.2 (C), 114.6 (C), 115.8 (CH), 118.2 (C), 118.6 (C), 127.7 (2CH), 128.7 (2CH), 132.4 (2CH), 132.7 (2CH), 140.7 (C), 141.2 (C), 158.6 (CH), 162.0 (C), 163.0 (C)

**HRMS (C<sub>18</sub>H<sub>10</sub>N<sub>4</sub>):** calc: 282.0905, found: 282.0911

➤ 4-[2-(4-Methoxy-phenyl)-pyrimidin-4-yl]-benzoic acid ethyl ester **3a**

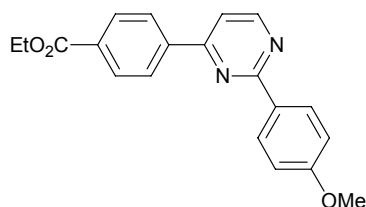

$C_{20}H_{18}N_2O_3$

Exact mass: 334.1317

Molecular weight: 334.37

White solid, mp: 128°C

According to general procedure 2.2.: from 4-bromoanisole and **1b**: **Zinc insertion and cross-coupling**.  $CoBr_2$  (30 mol%, 1 mmol, 220 mg), Zinc powder (7.5 mmol, 0.47 g) in acetonitrile (6 mL), allylchloride (2.25 mmol, 190  $\mu$ L), trifluoroacetic acid (100  $\mu$ L). R.T., 3 min, 4-bromoanisole (3 mmol, 0.37 mL), 2-methylthio-4-arylpyrimidine **1b** (3 mmol, 823 mg), 50 °C, 7 h. **work-up and purification**: extracted with dichloromethane (3 x 70 mL), purified by silica gel (pentane : ether = 40 : 60) to give **3a** as a white solid (652 mg, 65%).

**$^1H$ -NMR** (300MHz,  $CDCl_3$ )  $\delta$  /ppm: 1.46 (t, 7.2 Hz, 3H) ; 3.92 (s, 3H) ; 4.45 (q, 7.2Hz, 2H) ; 7.05 (d, 8.8 Hz, 2H) ; 7.58 (d, 5.2Hz, 1H) ; 8.25 (dd, 8.3Hz and 23.3Hz, 4H) ; 8.56 (d, 8.8Hz, 2H) ; 8.84 (d, 5.2Hz, 1H)

**$^{13}C$ -NMR** (75MHz,  $CDCl_3$ )  $\delta$  /ppm: 14.3 ( $CH_3$ ), 55.4 ( $CH_3$ ), 61.3 ( $CH_2$ ), 113.9 (2CH), 114.2 (CH), 127.1 (2CH), 130.0 (2CH), 130.1 (2CH), 130.3 (C), 132.4 (C), 141.1 (C), 158.1 (CH), 162.0 (C), 162.6 (C), 164.5 (C), 166.2 (C)

**HRMS** ( $C_{20}H_{18}N_2O_3$ ): calc: 334.1317, found: 334.1312

**IR**(neat, $cm^{-1}$ ): 2973,1714 (C=O), 1269, 1090

➤ 4-[2-(4-Trifluoromethyl-phenyl)-pyrimidin-4-yl]-benzoic acid ethyl ester **3b**

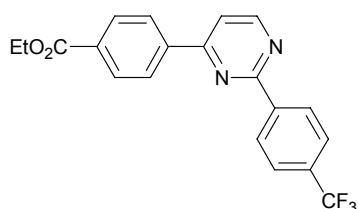

$C_{20}H_{15}F_3N_2O_2$

Exact mass: 372.1086

Molecular weight: 372.34

White solid



According to general procedure 2.2.: from 4-bromobenzotrifluoride and **1b**: **Zinc insertion and cross-coupling**. CoBr<sub>2</sub> (30 mol%, 1 mmol, 220 mg), Zinc powder (7.5 mmol, 0.47 g) in acetonitrile (6 mL), allylchloride (2.25 mmol, 190 μL), trifluoroacetic acid (100 μL). R.T., 3 min, 4-bromobenzotrifluoride (3 mmol, 0.4 mL), 2-methylthio-4-arylpyrimidine **1b** (3 mmol, 823 mg), 50 °C, 5 h. **work-up and purification**: extracted with dichloromethane (3 x 70 mL), purified by silica gel (petroleum ether : ether = 80 : 20) to give **3b** as a white solid (491 mg, 44 %).

<sup>1</sup>H-NMR (300MHz, CDCl<sub>3</sub>) δ /ppm: 1.46 (t, 7.2 Hz, 3H), 4.46 (q, 7.2Hz, 2H), 7.73 (d, 5.3 Hz, 1H), 7.80 (d, 8.3 Hz, 2H), 8.28 (m, 4H), 8.72 (d, 7.90 Hz, 2H), 8.94 (d, 5.3 Hz, 1H).

<sup>13</sup>C-NMR (75MHz, CDCl<sub>3</sub>) δ /ppm: 14.3 (CH<sub>3</sub>), 61.4 (CH<sub>2</sub>), 115.7 (CH), 124.0 (q, <sup>1</sup>J<sub>C-F</sub> = 254.1 Hz, C), 125.6 (q, <sup>3</sup>J<sub>C-F</sub> = 3.8 Hz, 2CH), 127.2 (2CH), 128.6 (2CH), 130.2 (2CH), 132.3 (q, <sup>2</sup>J<sub>C-F</sub> = 31.7 Hz, C), 132.7 (C), 140.5 (2C), 158.3 (CH), 163.1 (2C), 166.1 (C).

HRMS (C<sub>20</sub>H<sub>15</sub>F<sub>3</sub>N<sub>2</sub>O<sub>2</sub>): calc: 372.1086, found: 372.1091

➤ 2-(4-Methoxy-phenyl)-4-(4-trifluoromethyl-phenyl)-pyrimidine **3c**

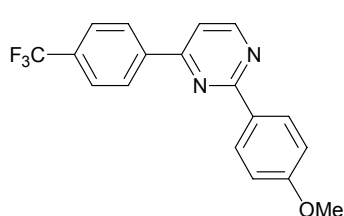

C<sub>18</sub>H<sub>13</sub>F<sub>3</sub>N<sub>2</sub>O

Exact mass: 330.0980

Molecular weight: 330.30

White solid, mp: 144°C

According to general procedure 2.2.: from 4-bromoanisole and **1a**: **Zinc insertion and cross-coupling**. CoBr<sub>2</sub> (30 mol%, 1 mmol, 220 mg), Zinc powder (7.5 mmol, 0.47 g) in acetonitrile (6 mL), allylchloride (2.25 mmol, 190 μL), trifluoroacetic acid (100 μL). R.T., 3 min, 4-bromoanisole (3 mmol, 0.37 mL), 2-methylthio-4-arylpyrimidine **1a** (3 mmol, 811 mg), 50 °C, 7 h. **work-up and purification**: extracted with dichloromethane (3 x 70 mL), purified by silica gel (petroleum ether : ether = 90 : 10) to give **3c** as a white solid (525 mg, 53 %).

<sup>1</sup>H-NMR (300MHz, CDCl<sub>3</sub>) δ /ppm: 3.92 (s, 3H) ; 7.05 (d, 8.8Hz, 2H) ; 7.57 (d, 5.22 Hz, 1H) ; 7.80 (d, 8.5Hz, 2H) ; 8.33 (d, 8.2Hz, 2H) ; 8.56 (d, 8.8Hz, 2H) ; 8.86 (d, 5.2Hz, 1H).

$^{13}\text{C-NMR}$  (75MHz,  $\text{CDCl}_3$ )  $\delta$  /ppm: 55.4 ( $\text{CH}_3$ ), 113.9 (2CH), 114.1 (CH), 125.9 (q,  $^3\text{J}_{\text{C-F}} = 3.8$  Hz, 2CH), 127.1 (q,  $^1\text{J}_{\text{C-F}} = 250$  Hz, C), 127.5 (2CH), 130.0 (2CH), 130.2 (C), 132.4 (q,  $^2\text{J}_{\text{C-F}} = 30.2$  Hz, C), 140.5 (q,  $^5\text{J}_{\text{C-F}} = 1.4$  Hz, C), 158.2 (CH), 162.1 (C), 162.2 (C), 164.6 (C).

**HRMS** ( $\text{C}_{18}\text{H}_{13}\text{F}_3\text{N}_2\text{O}$ ): calc: 330.0980, found: 330.0980

**IR**(neat, $\text{cm}^{-1}$ ): 2974, 1088,

➤ 4-[4-(4-Trifluoromethyl-phenyl)-pyrimidin-2-yl]-benzoic acid ethyl ester **3d**

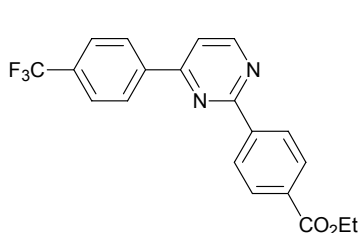

$\text{C}_{20}\text{H}_{15}\text{F}_3\text{N}_2\text{O}_2$

Exact mass: 372.1086

Molecular weight: 372.34

White solid, mp : 148°C

According to general procedure 2.2.: from ethyl 4-bromobenzoate and **1a**: **Zinc insertion and cross-coupling**.  $\text{CoBr}_2$  (30 mol%, 1 mmol, 220 mg), Zinc powder (7.5 mmol, 0.47 g) in acetonitrile (6 mL), allylchloride (2.25 mmol, 190  $\mu\text{L}$ ), trifluoroacetic acid (100  $\mu\text{L}$ ). R.T., 3 min, ethyl 4-bromobenzoate (3 mmol, 0.5 mL), 2-methylthio-4-arylpyrimidine **1a** (3 mmol, 811 mg), 50 °C, 7 h. **work-up and purification**: extracted with dichloromethane (3 x 70 mL), purified by silica gel (petroleum ether : ether = 80 : 20) to give **3d** as a white solid (335 mg, 30 %).

$^1\text{H-NMR}$  (300MHz,  $\text{CDCl}_3$ )  $\delta$  /ppm: 1.46 (t, 7.1 Hz, 3H) ; 4.45 (q, 7.1 Hz, 2H) ; 7.69 (m, 1H) ; 7.83 (m, 2H) ; 8.20 (m, 2H) ; 8.34 (m, 2H) ; 8.65 (m, 2H) ; 8.94 (m, 1H).

$^{13}\text{C-NMR}$  (75MHz,  $\text{CDCl}_3$ )  $\delta$  /ppm: 14.3 ( $\text{CH}_3$ ), 61.2 ( $\text{CH}_2$ ), 115.4 (CH), 125.0 (q,  $^1\text{J}_{\text{C-F}} = 254.1$  Hz, C), 125.9 (q,  $^3\text{J}_{\text{C-F}} = 3.8$  Hz, 2CH), 127.6 (2CH), 128.2 (2CH), 129.8 (2CH), 132.1 (q,  $^2\text{J}_{\text{C-F}} = 31.8$  Hz, C), 132.4 (C), 140.0 (C), 141.4 (C), 158.4 (CH), 162.6 (C), 163.9 (C), 166.4 (C).

**HRMS** ( $\text{C}_{20}\text{H}_{15}\text{F}_3\text{N}_2\text{O}_2$ ): calc: 372.1086, found: 372.1087

**IR**(neat, $\text{cm}^{-1}$ ): 1710 (C=O), 1562, 1323, 1272, 1066

➤ 4-[2-(4-Methoxy-phenyl)-pyrimidin-4-yl]-benzonitrile **3e**

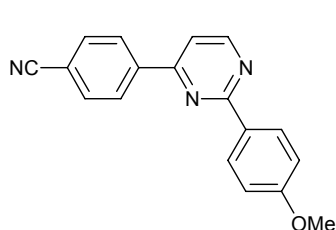

$\text{C}_{18}\text{H}_{13}\text{N}_3\text{O}$

Exact mass: 287.1059

Molecular weight: 287.32

White solid

According to general procedure 2.2.: from 4-bromoanisole and **1c**: **Zinc insertion and cross-coupling**. CoBr<sub>2</sub> (30 mol%, 1 mmol, 220 mg), Zinc powder (7.5 mmol, 0.47 g) in acetonitrile (6 mL), allylchloride (2.25 mmol, 190 μL), trifluoroacetic acid (100 μL). R.T., 3 min, 4-bromoanisole (3 mmol, 0.43 mL), 2-methylthio-4-arylpyrimidine **1c** (3 mmol, 682 mg), 50 °C, 5 h. **work-up and purification**: extracted with dichloromethane (3 x 70 mL), purified by silica gel (pentane : ether = 40 : 60) to give **3e** as a white solid (646 mg, 75 %).

**<sup>1</sup>H-NMR** (300MHz, CDCl<sub>3</sub>) δ /ppm: 3.93 (s, 3H), 7.06 (d, 8.5Hz, 2H), 7.58 (d, 4.9Hz, 1H), 7.85 (d, 8.1Hz, 2H), 8.34 (d, 8.1Hz, 2H), 8.55 (d, 8.5Hz, 2H), 8.89 (d, 4.9Hz, 1H).

**<sup>13</sup>C-NMR** (75MHz, CDCl<sub>3</sub>) δ /ppm: : 55.4 (CH<sub>3</sub>), 60.7 (C), 114.0 (2CH), 114.3 (CH), 118.5 (C), 127.8 (2CH), 129.9 (C), 130.1 (2CH), 132.7 (2CH), 141.3 (C), 158.3 (CH), 161.8 (C), 162.2 (C), 164.7 (C).

**HRMS (C<sub>18</sub>H<sub>13</sub>N<sub>3</sub>O)**: calc: 287.1059, found: 287.1060

**General Procedures 3.1 and 3.2: for the synthesis of 2-benzylbenzo[b]thiazoles 4a-b and 2-arylbenzo[b]thiazoles 4c-g from benzyl- and arylzinc derivatives and 2-methylthiobenzo[b]thiazole**

**Procedure 3.1. from benzylchlorides: Zinc insertion and cross-coupling.** To a solution of CoBr<sub>2</sub> (30 mol%), and Zinc powder (1.5 equivalents) in acetonitrile (4 mL) were successively added at room temperature allylchloride (90 mol%) and trifluoroacetic acid (100 μL), causing an immediate rise in temperature and color change to dark grey. After stirring the resulting mixture for 3 minutes, benzylchloride derivative and 2-methylthiobenzo[b]thiazole (1 equivalent) were added. The medium was then stirred at 50 °C until benzylchloride was consumed. *Work-up and purification.* The reaction mixture was poured into a saturated aqueous solution of NH<sub>4</sub>Cl and extracted with dichloromethane. The organic layer was washed with a saturated aqueous solution of NaCl and dried over MgSO<sub>4</sub>. Evaporation of solvent and purification by column chromatography on silica gel (petroleum ether/diethyl ether) afforded the coupling product characterized by NMR (<sup>1</sup>H, <sup>13</sup>C) and mass spectrometry.

**Procedure 3.2.** from arylbromides: *Synthesis of ArZnBr.* To a solution of CoBr<sub>2</sub> (10 mol%, 0.75 mmol, 165 mg) and Zinc powder (12.5 mmol, 820 mg) in acetonitrile (6 mL) were successively added at room temperature allylchloride (2.25 mmol, 190  $\mu$ L) and trifluoroacetic acid (100  $\mu$ L), causing an immediate rise in temperature and color change to dark grey. After stirring the resulting mixture for 3 minutes, aryl bromide (7.5 mmol) was added. The medium was then stirred at room temperature until complete conversion of aryl bromide.

*Cross-coupling reaction.* 2-methylthio-benzo[*b*]thiazole (5 mmol, 906 mg) and CoBr<sub>2</sub> (20 mol%, 1 mmol, 220 mg) were added and the medium was stirred at 50 °C until ArZnBr was consumed. The amounts of the corresponding ArZnBr and coupling product were measured by GC (addition of iodine) using an internal reference (dodecane, 200  $\mu$ L); *Work-up and purification.* The reaction mixture was poured into a saturated aqueous solution of NH<sub>4</sub>Cl and extracted with dichloromethane. The organic layer was washed with a saturated aqueous solution of NaCl and dried over MgSO<sub>4</sub>. Evaporation of solvent and purification by column chromatography on silica gel (petroleum ether / diethyl ether) afforded the coupling product characterized by NMR (<sup>1</sup>H, <sup>13</sup>C) and mass spectrometry.

**General Procedure 4: for the synthesis of 2-arylbenzo[*b*]thiazoles 4c-g and 2-arylthiazoles 5a-c from arylhalides and zinc species from 2-methylthiobenzo[*b*]thiazole and 2-methylthiothiazole.**

**Procedure 4.** from 2-methylthiothiazole or 2-methylthiobenzo[*b*]thiazole: *Synthesis of HetArZnSMe.* To a solution of CoBr<sub>2</sub> (1.14 mmol, 250 mg) and Zinc powder (18 mmol, 1.2 g) in acetonitrile (6 mL) were successively added at room temperature allylchloride (3.68 mmol, 300  $\mu$ L) and trifluoroacetic acid (100  $\mu$ L), causing an immediate rise in temperature and color change to dark grey. After stirring the resulting mixture for 3 minutes, 2-methylthiobenzo[*b*]thiazole (5 mmol, 906 mg) or 2-methylthiothiazole (5 mmol, 0.5 mL) was added. The medium was then stirred at 30 °C until complete conversion of the 2-methylthio derivative.

*Cross-coupling reaction.* DMF (2 mL) was added. Then, PdCl<sub>2</sub>(PPh<sub>3</sub>)<sub>2</sub> (0.128 mmol, 90 mg) and the arylhalide (8.5 mmol) were added to the solution and the medium was stirred at 35 °C until HetArZnSMe was consumed. The amounts of the corresponding HetArZnSMe and coupling product were measured by GC (addition of iodine) using an internal reference

(dodecane, 200  $\mu$ L); *Work-up and purification*. The reaction mixture was poured into a saturated aqueous solution of  $\text{NH}_4\text{Cl}$  and extracted with ethyl acetate. The organic layer was washed with a saturated aqueous solution of  $\text{NaCl}$  and dried over  $\text{MgSO}_4$ . Evaporation of solvent and purification by column chromatography on silica gel (petroleum ether / diethyl ether or petroleum ether / ethyl acetate) afforded the coupling product characterized by NMR ( $^1\text{H}$ ,  $^{13}\text{C}$ ) and mass spectrometry.

➤ 2-Benzyl-benzothiazole **4a**

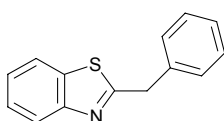

$\text{C}_{14}\text{H}_{11}\text{NS}$

CAS: 6265-94-7

Exact mass: 225.0612

Molecular weight: 225.31

Yellow oil

According to general procedure 3.1.: from benzyl chloride: **Zinc insertion and Cross-coupling reaction**.  $\text{CoBr}_2$  (30 mol%, 1.5 mmol, 330 mg), Zinc powder (12.5 mmol, 820 mg) in acetonitrile (4 mL), allylchloride (4.5 mmol, 375  $\mu$ L), trifluoroacetic acid (100  $\mu$ L), R.T., 3 min, benzylchloride (5 mmol, 0.57 mL), 2-methylthio-benzo[*b*]thiazole (5 mmol, 906 mg), 50  $^\circ\text{C}$ , 17 h. **work-up and purification**: extracted with dichloromethane (3 x 70 mL), purified by silica gel (petroleum ether: ether = 90 : 10) to give **4a** as a yellow oil (709 mg, 63 %).

$^1\text{H-NMR}$  (300MHz,  $\text{CDCl}_3$ )  $\delta$  /ppm: 4.47 (s, 2H), 7.33-7.40 (m, 6H), 7.48 (m, 1H), 7.81 (m, 1H), 8.02 (m, 1H).

$^{13}\text{C-NMR}$  (75MHz,  $\text{CDCl}_3$ )  $\delta$  /ppm: 40.7 ( $\text{CH}_2$ ), 121.5 (CH), 122.8 (CH), 124.8 (CH), 125.9 (CH), 127.4 (CH), 128.9 (2CH), 129.2 (2CH), 135.7 (C), 137.2 (C), 153.3 (C), 171.2 (C)

➤ 2-(4-Fluoro-benzyl)-benzothiazole **4b**

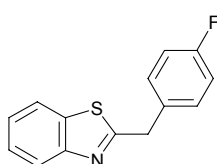

$\text{C}_{14}\text{H}_{10}\text{FNS}$

CAS: 37859-33-9

Exact mass: 243.0518

Molecular weight: 243.30

Pale yellow oil

According to general procedure 3.1.: from 4-fluorobenzyl chloride: **Zinc insertion and Cross-coupling reaction.** CoBr<sub>2</sub> (30 mol%, 0.9 mmol, 198 mg), Zinc powder (7.5 mmol, 491 mg) in acetonitrile (3 mL), allylchloride (2.7 mmol, 225 μL), trifluoroacetic acid (100 μL), R.T., 3 min, 4-fluorobenzyl chloride (3 mmol, 0.40 mL), 2-methylthio-benzo[*b*]thiazole (3 mmol, 544 mg), 50 °C, 17 h. **work-up and purification:** extracted with dichloromethane (3 x 70 mL), purified by silica gel (petroleum ether : ether = 90 : 10) to give **4b** as a pale yellow oil (401 mg, 55 %).

<sup>1</sup>H-NMR (300MHz, CDCl<sub>3</sub>) δ /ppm: 4.43 (s, 2H), 7.03-7.08 (m, 2H), 7.33-7.40 (m, 3H), 7.45-7.51 (m, 1H), 7.81-7.84 (m, 1H), 8.00-8.03 (m, 1H).

<sup>13</sup>C-NMR (75MHz, CDCl<sub>3</sub>) δ /ppm: 38.2 (CH<sub>2</sub>), 114.1 (CH), 114.4 (CH), 120.0 (CH), 121.3 (CH), 123.4 (CH), 124.6 (CH), 129.2 (CH), 129.3 (CH), 131.4 (C), 131.4 (C), 151.8 (C), 159.0 (C), 169.3 (C).

➤ 2-(4-Methoxy-phenyl)-benzothiazole **4c**

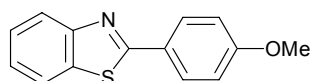

C<sub>14</sub>H<sub>11</sub>NOS

CAS: 6265-92-5

Exact mass: 241.0561

Molecular weight: 241.31

White solid

According to general procedure 3.2.: from 4-bromoanisole: **Synthesis of ArZnBr.** CoBr<sub>2</sub> (10 mol%, 0.75 mmol, 165 mg), Zinc powder (12.5 mmol, 820 mg) in acetonitrile (6 mL), allylchloride (2.25 mmol, 190 μL), trifluoroacetic acid (100 μL), R.T., 3 min, 4-bromoanisole (7.5 mmol, 0.94 mL), R.T., 45 min. **Cross-coupling reaction.** 2-methylthio-benzo[*b*]thiazole (5 mmol, 906 mg), CoBr<sub>2</sub> (20 mol%, 1 mmol, 220 mg) 50 °C, 12 h. **work-up and purification:** extracted with dichloromethane (3 x 70 mL), purified by silica gel (petroleum ether : ether = 90 : 10) to give **4c** as a white solid (724 mg, 60 %).

According to general procedure 4.: from 2-methylthiobenzo[*b*]thiazole: **Synthesis of HetArZnSMe**. CoBr<sub>2</sub> (1.14 mmol, 250 mg), Zinc powder (18 mmol, 1.2 g) in acetonitrile (6 mL), allylchloride (3.68 mmol, 300 μL), trifluoroacetic acid (100 μL), R.T., 3 min, 2-methylthiobenzo[*b*]thiazole (5 mmol, 906 mg) , 35 °C. **Cross-coupling reaction with 4-iodoanisole**. DMF (2 mL), PdCl<sub>2</sub>(PPh<sub>3</sub>)<sub>2</sub> (0.128 mmol, 90 mg), 4-iodoanisole (8.5 mmol, 1.99 g), 35 °C. **work-up and purification**: extracted with ethylacetate (3 x 70 mL), purified by silica gel (petroleum ether : ether = 90 : 10) to give **4c** as a white solid (844 mg, 70 %).

<sup>1</sup>H-NMR (300MHz, CDCl<sub>3</sub>) δ /ppm: 3.90 (s, 3H), 7.02 (m, 2H), 7.38 (m, 1H), 7.49 (m, 1H), 7.90 (m, 1H), 7.91 (m, 3H).

<sup>13</sup>C-NMR (75MHz, CDCl<sub>3</sub>) δ /ppm: 55.5 (CH<sub>3</sub>), 114.4 (2CH), 121.5 (CH), 122.8 (CH), 124.8 (CH), 126.2 (CH), 126.4 (C), 129.1 (2 CH), 134.9 (C), 154.2 (C), 161.9 (C), 167.9 (C)

HRMS (C<sub>14</sub>H<sub>11</sub>NOS): calc: 241.0561, found: 241.0558

➤ 4-Benzothiazol-2-yl-benzoic acid ethyl ester **4e**

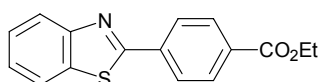

C<sub>16</sub>H<sub>13</sub>NO<sub>2</sub>S

CAS: 1030513-24-6

Exact mass: 283.0667

Molecular weight: 283.35

White solid

According to general procedure 3.2.: from ethyl 4-bromobenzoate: **Synthesis of ArZnBr**. CoBr<sub>2</sub> (10 mol%, 0.75 mmol, 165 mg), Zinc powder (12.5 mmol, 820 mg) in acetonitrile (6 mL), allylchloride (2.25 mmol, 190 μL), trifluoroacetic acid (100 μL), R.T., 3 min, ethyl 4-bromobenzoate (7.5 mmol, 1.22 mL), R.T., 1 h. **Cross-coupling reaction**. 2-methylthio-benzo[*b*]thiazole (5 mmol, 906 mg), CoBr<sub>2</sub> (20 mol%, 1 mmol, 220 mg) 50 °C, 6 h. **work-up and purification**: extracted with dichloromethane (3 x 70 mL), purified by silica gel (petroleum ether : ether = 90 : 10) to give **4e** as a white solid (807 mg, 57 %).

According to general procedure 4.: from 2-methylthiobenzo[*b*]thiazole: **Synthesis of HetArZnSMe**. CoBr<sub>2</sub> (1.14 mmol, 250 mg), Zinc powder (18 mmol, 1.2 g) in acetonitrile (6 mL), allylchloride (3.68 mmol, 300 μL), trifluoroacetic acid (100 μL), R.T., 3 min, 2-methylthiobenzo[*b*]thiazole (5 mmol, 906 mg) , 35 °C. **Cross-coupling reaction with ethyl 4-**

**iodobenzoate.** DMF (2 mL), PdCl<sub>2</sub>(PPh<sub>3</sub>)<sub>2</sub> (0.128 mmol, 90 mg), ethyl 4-iodobenzoate (8.5 mmol, 1.41 mL), 35 °C. **work-up and purification:** extracted with ethylacetate (3 x 70 mL), purified by silica gel (petroleum ether : ether = 90 : 10) to give **4e** as a white solid (920 mg, 65 %).

<sup>1</sup>H-NMR (300MHz, CDCl<sub>3</sub>) δ /ppm: 1.45 (t, 7.1 Hz, 3H), 4.44 (q, 7.1 Hz, 2H), 7.45 (m, 2H), 7.69 (m, 1H), 7.96 (m, 1H), 8.17 (m, 4H).

<sup>13</sup>C-NMR (75MHz, CDCl<sub>3</sub>) δ /ppm: 14.3 (CH<sub>3</sub>), 61.1 (CH<sub>2</sub>), 121.7 (CH), 123.6 (CH), 125.7 (CH), 126.6 (CH), 127.2 (2CH), 127.3 (2CH), 132.4 (C), 135.3 (C), 144.3 (C), 154.1 (C), 166.0 (C), 166.7 (C).

**HRMS (C<sub>16</sub>H<sub>13</sub>NO<sub>2</sub>S):** calc: 283.0667, found: 283.0667

➤ 2-(4-Trifluoromethyl-phenyl)-benzothiazole **4f**

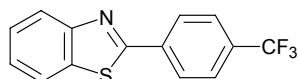

C<sub>14</sub>H<sub>8</sub>F<sub>3</sub>NS

CAS: 134384-31-9

Exact mass: 279.0330

Molecular weight: 279.28

White solid

According to general procedure 3.2.: from 4-bromobenzotrifluoride: **Synthesis of ArZnBr.** CoBr<sub>2</sub> (10 mol%, 0.75 mmol, 165 mg), Zinc powder (12.5 mmol, 820 mg) in acetonitrile (6 mL), allylchloride (2.25 mmol, 190 μL), trifluoroacetic acid (100 μL), R.T., 3 min, 4-bromobenzotrifluoride (7.5 mmol, 1.0 mL), R.T., 1 h. **Cross-coupling reaction.** 2-methylthio-benzo[*b*]thiazole (5 mmol, 906 mg), CoBr<sub>2</sub> (20 mol%, 1 mmol, 220 mg) 50 °C, 4 h. **work-up and purification:** extracted with dichloromethane (3 x 70 mL), purified by silica gel (petroleum ether : ether = 90 : 10) to give **4f** as a white solid (698 mg, 50 %).

According to general procedure 4.: from 2-methylthiobenzo[*b*]thiazole: **Synthesis of HetArZnSMe.** CoBr<sub>2</sub> (1.14 mmol, 250 mg), Zinc powder (18 mmol, 1.2 g) in acetonitrile (6 mL), allylchloride (3.68 mmol, 300 μL), trifluoroacetic acid (100 μL), R.T., 3 min, 2-methylthiobenzo[*b*]thiazole (5 mmol, 906 mg) , 35 °C. **Cross-coupling reaction with 4-iodobenzotrifluoride.** DMF (2 mL), PdCl<sub>2</sub>(PPh<sub>3</sub>)<sub>2</sub> (0.128 mmol, 90 mg), 4-iodobenzotrifluoride (8.5 mmol, 1.95 g), 35 °C. **work-up and purification:** extracted with



ethylacetate (3 x 70 mL), purified by silica gel (petroleum ether : ether = 90 : 10) to give **4f** as a white solid (768 mg, 55 %).

**<sup>1</sup>H-NMR** (300MHz, CDCl<sub>3</sub>) δ /ppm: 7.51 (m, 2H), 7.78 (m, 2H), 7.95 (m, 1H), 8.13 (m, 1H), 8.23 (m, 2H).

**<sup>13</sup>C-NMR** (75MHz, CDCl<sub>3</sub>) δ /ppm: 121.8 (CH), 122.0 (CH), 123.8 (q, <sup>1</sup>J<sub>C-F</sub> = 272.4 Hz, C), 125.8 (CH), 126.0 (q, <sup>3</sup>J<sub>C-F</sub> = 3.8 Hz, 2CH), 126.7 (CH), 127.8 (2CH), 132.4 (q, <sup>2</sup>J<sub>C-F</sub> = 32.5 Hz, C), 135.2 (C), 136.7 (q, <sup>5</sup>J<sub>C-F</sub> = 1.2 Hz, C), 154.0 (C), 166.0 (C).

**HRMS (C<sub>14</sub>H<sub>8</sub>F<sub>3</sub>NS):** calc: 279.0330, found: 279.0332

➤ 4-Benzothiazol-2-yl-benzonitrile **4g**

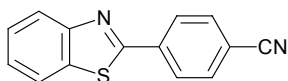

C<sub>14</sub>H<sub>8</sub>N<sub>2</sub>S

CAS: 17930-02-8

Exact mass: 236.0408

Molecular weight: 236.29

White solid

According to general procedure 3.2.: from 4-bromobenzonitrile: **Synthesis of ArZnBr.** CoBr<sub>2</sub> (10 mol%, 0.75 mmol, 165 mg), Zinc powder (12.5 mmol, 820 mg) in acetonitrile (6 mL), allylchloride (2.25 mmol, 190 μL), trifluoroacetic acid (100 μL), R.T., 3 min, 4-bromobenzonitrile (7.5 mmol, 1.4 g), R.T., 1 h. **Cross-coupling reaction.** 2-methylthio-benzo[*b*]thiazole (5 mmol, 906 mg), CoBr<sub>2</sub> (20 mol%, 1 mmol, 220 mg) 50 °C, 6 h. **work-up and purification:** extracted with dichloromethane (3 x 70 mL), purified by silica gel (petroleum ether: ether = 80 : 20) to give **4g** as a white solid (530 mg, 45 %).

According to general procedure 4.: from 2-methylthiobenzo[*b*]thiazole: **Synthesis of HetArZnSMe.** CoBr<sub>2</sub> (1.14 mmol, 250 mg), Zinc powder (18 mmol, 1.2 g) in acetonitrile (6 mL), allylchloride (3.68 mmol, 300 μL), trifluoroacetic acid (100 μL), R.T., 3 min, 2-methylthiobenzo[*b*]thiazole (5 mmol, 906 mg), 35 °C. **Cross-coupling reaction with 4-iodobenzonitrile.** DMF (2 mL), PdCl<sub>2</sub>(PPh<sub>3</sub>)<sub>2</sub> (0.128 mmol, 90 mg), 4-iodobenzonitrile (8.5 mmol, 1.24 mL), 35 °C. **work-up and purification:** extracted with ethylacetate (3 x 70 mL), purified by silica gel (petroleum ether : ether = 80 : 20) to give **4g** as a white solid (589 mg, 50 %). **Cross-coupling reaction with 4-bromobenzonitrile.** DMF (2 mL), PdCl<sub>2</sub>(PPh<sub>3</sub>)<sub>2</sub>

(0.128 mmol, 90 mg), 4-bromobenzonitrile (8.5 mmol, 1.6 g), 35 °C. **work-up and purification:** extracted with ethylacetate (3 x 70 mL), purified by silica gel (petroleum ether : ether = 80 : 20) to give **4g** as a white solid (648 mg, 55 %).

**<sup>1</sup>H-NMR** (300MHz, CDCl<sub>3</sub>) δ /ppm: 7.50 (m, 2H), 7.79 (m, 2H), 7.96 (m, 1H), 8.13 (m, 1H), 8.23 (m, 2H).

**<sup>13</sup>C-NMR** (75MHz, CDCl<sub>3</sub>) δ /ppm: 114.1 (C), 118.3 (C), 121.8 (CH), 123.8 (CH), 126.1 (CH), 126.8 (CH), 127.9 (2CH), 132.8 (2 CH), 135.3 (C), 137.5 (C), 154.0 (C), 165.4 (C)

**HRMS (C<sub>14</sub>H<sub>8</sub>N<sub>2</sub>S):** calc: 236.0408, found: 236.0401

➤ 2-(4-methoxyphenyl)thiazole **5a**

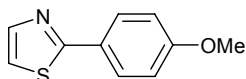

C<sub>10</sub>H<sub>9</sub>NOS

CAS: 27088-84-2

Exact mass: 191.0405

Molecular weight: 191.25

White solid

According to general procedure 4.: from 2-methylthiothiazole: **Synthesis of HetArZnSMe.** CoBr<sub>2</sub> (1.14 mmol, 250 mg), Zinc powder (18 mmol, 1.2 g) in acetonitrile (6 mL), allylchloride (3.68 mmol, 300 μL), trifluoroacetic acid (100 μL), R.T., 3 min, 2-methylthiothiazole (5 mmol, 0.5 mL), 35 °C. **Cross-coupling reaction with 4-iodoanisole.** DMF (2 mL), PdCl<sub>2</sub>(PPh<sub>3</sub>)<sub>2</sub> (0.128 mmol, 90 mg), 4-iodoanisole (8.5 mmol, 1.99 g), 35 °C. **work-up and purification:** extracted with ethylacetate (3 x 70 mL), purified by silica gel (petroleum ether : ethyl acetate) to give **5a** as a white solid (526 mg, 55 %).

**<sup>1</sup>H-NMR** (300MHz, CDCl<sub>3</sub>) δ /ppm: 7.93 (d, 8.64 Hz, 2H), 7.83 (d, 2.9Hz, 1H), 7.28 (d, 2.9 Hz, 1H), 6.98 (d, 8.67Hz, 2H), 3.88 (s, 3H).

**<sup>13</sup>C-NMR** (75MHz, CDCl<sub>3</sub>) δ /ppm: 168.7 (C), 161.5 (C), 143.7 (CH), 128.4 (2CH), 126.9 (C), 118.2 (CH), 114.7 (2CH), 55.8 (CH<sub>3</sub>)

➤ ethyl 4-(thiazol-2-yl)benzoate **5b**

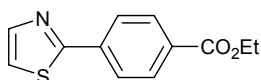

C<sub>12</sub>H<sub>11</sub>NO<sub>2</sub>S

CAS: 257876-04-3

Exact mass: 233.051

Molecular weight: 233.29

White solid

According to general procedure 4.: from 2-methylthiothiazole: **Synthesis of HetArZnSMe.** CoBr<sub>2</sub> (1.14 mmol, 250 mg), Zinc powder (18 mmol, 1.2 g) in acetonitrile (6 mL), allylchloride (3.68 mmol, 300 μL), trifluoroacetic acid (100 μL), R.T., 3 min, 2-methylthiothiazole (5 mmol, 0.5 mL), 35 °C. **Cross-coupling reaction with ethyl 4-iodobenzoate.** DMF (2 mL), PdCl<sub>2</sub>(PPh<sub>3</sub>)<sub>2</sub> (0.128 mmol, 90 mg), ethyl 4-iodobenzoate (8.5 mmol, 1.41 mL), 35 °C. **work-up and purification:** extracted with ethylacetate (3 x 70 mL), purified by silica gel (petroleum ether : ethyl acetate) to give **5b** as a white solid (338 mg, 29 %).

<sup>1</sup>H-NMR (300MHz, CDCl<sub>3</sub>) δ /ppm: 8.26 (d, 8.1 Hz, 2H), 8.18 (d, 8.1Hz, 2H), 8.06 (d, 3 Hz,1H), 7.54 (d, 3Hz, 1H), 4.53 (q, 2H), 1.56 (t, 3H)

<sup>13</sup>C-NMR (75MHz, CDCl<sub>3</sub>) δ /ppm: 167.5 (C), 166.4 (C), 144.5 (CH), 137.6 (C), 131.9 (C), 130.6 (2CH), 126.8 (2CH), 120.3 (CH), 61.6 (CH<sub>2</sub>), 14.7 (CH<sub>3</sub>)

➤ 4-(thiazol-2-yl)benzonitrile **5c**

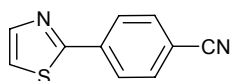

C<sub>10</sub>H<sub>6</sub>N<sub>2</sub>S

CAS: 672324-84-4

Exact mass: 186.0252

Molecular weight: 186.23

White solid

According to general procedure 4.: from 2-methylthiothiazole: **Synthesis of HetArZnSMe.** CoBr<sub>2</sub> (1.14 mmol, 250 mg), Zinc powder (18 mmol, 1.2 g) in acetonitrile (6 mL), allylchloride (3.68 mmol, 300 μL), trifluoroacetic acid (100 μL), R.T., 3 min, 2-methylthiothiazole (5 mmol, 0.5 mL), 35 °C. **Cross-coupling reaction with 4-iodobenzonitrile.** DMF (2 mL), PdCl<sub>2</sub>(PPh<sub>3</sub>)<sub>2</sub> (0.128 mmol, 90 mg), 4-iodobenzonitrile (8.5 mmol, 1.95 g), 35 °C. **work-up and purification:** extracted with ethylacetate (3 x 70 mL), purified by silica gel (petroleum ether : ethyl acetate) to give **5c** as a white solid (317 mg, 34

%). **Cross-coupling reaction with 4-bromobenzonitrile.** DMF (2 mL), PdCl<sub>2</sub>(PPh<sub>3</sub>)<sub>2</sub> (0.128 mmol, 90 mg), 4-bromobenzonitrile (8.5 mmol, 1.6 g), 35 °C. **work-up and purification:** extracted with ethylacetate (3 x 70 mL), purified by silica gel (petroleum ether : ethyl acetate) to give **5c** as a white solid (2.45 g, 49 %).

**<sup>1</sup>H-NMR** (300MHz, CDCl<sub>3</sub>) δ /ppm: 8.06 (d, 8.2 Hz, 2H), 7.93 (d, 3 Hz, 1H), 7.72 (d, 8.2 Hz, 2H), 7.44 (d, 3Hz, 1H)

**<sup>13</sup>C-NMR** (75MHz, CDCl<sub>3</sub>) δ /ppm: 166.3 (C), 144.9 (CH), 137.8 (C), 133.2 (2CH), 127.4 (2CH), 121.0 (CH), 118.8 (C), 113.6 (C)
